# Supplementary material
Source: PubMed Central journal article supplement (PMC7141964)

Supplemental Figure 2

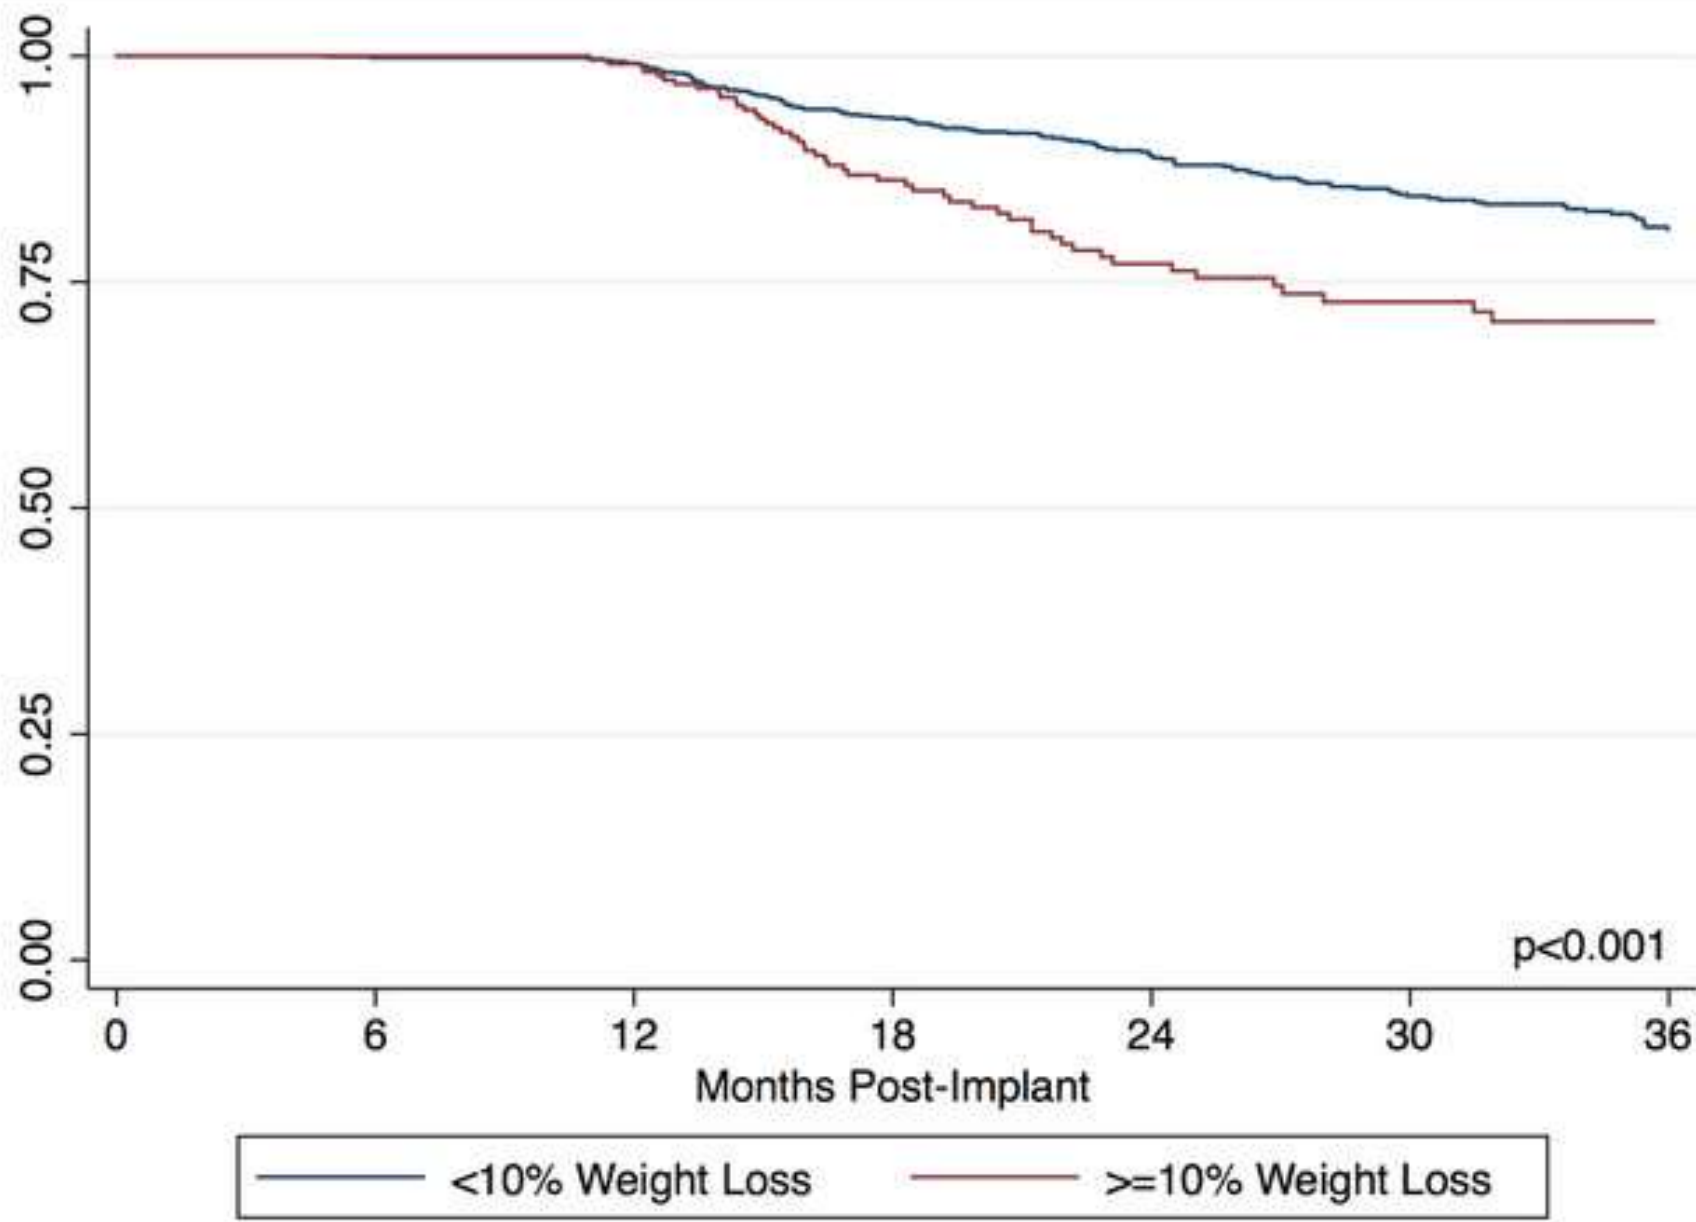

Supplement: NIHMS1545493-supplement-2.pdf [file NIHMS1545493-supplement-2.pdf]
